# Supplementary material for: Using Quality Improvement to Design and Evaluate an Outpatient Day Treatment Pathway for Pediatric Patients with Diabetes Mellitus Requiring Insulin Initiation
Source: PubMed Central journal article supplement (PMC11578214; doi:10.1097/pq9.0000000000000776), 2024-11-20
Supplement: pqs-9-e776-s002.pdf [file pqs-9-e776-s002.pdf]

**Title:** Using Quality Improvement to Design and Evaluate an Outpatient Day Treatment Pathway for Education and Management of Pediatric Patients with Diabetes Mellitus Requiring Insulin Initiation

**First Authors:** Svetlana Azova, MD, Charumathi Baskaran, MD

**SDC, Figure 1.** Daily Visit Schedule for the Diabetes Day Treatment Program-Emergency Department Referral Pathway

|                                                                                                                                                                                                                                                                                                                                                                                                                                                                                                                                                                                                                                                                                                                                                                                                                                                                                                                                                                                                                                                                                                                                                                                                                                                                                                                                                                                                                              |                                                                                                                                                                                                                                                                                                                                                                                                                                                                                                                                                                                                                                                                                                                                                                                                                                                                                                                                                                                                                                                                                                                                                                                                                       |
|------------------------------------------------------------------------------------------------------------------------------------------------------------------------------------------------------------------------------------------------------------------------------------------------------------------------------------------------------------------------------------------------------------------------------------------------------------------------------------------------------------------------------------------------------------------------------------------------------------------------------------------------------------------------------------------------------------------------------------------------------------------------------------------------------------------------------------------------------------------------------------------------------------------------------------------------------------------------------------------------------------------------------------------------------------------------------------------------------------------------------------------------------------------------------------------------------------------------------------------------------------------------------------------------------------------------------------------------------------------------------------------------------------------------------|-----------------------------------------------------------------------------------------------------------------------------------------------------------------------------------------------------------------------------------------------------------------------------------------------------------------------------------------------------------------------------------------------------------------------------------------------------------------------------------------------------------------------------------------------------------------------------------------------------------------------------------------------------------------------------------------------------------------------------------------------------------------------------------------------------------------------------------------------------------------------------------------------------------------------------------------------------------------------------------------------------------------------------------------------------------------------------------------------------------------------------------------------------------------------------------------------------------------------|
| <p><b>DAY 1: Introduction, Insulin Basics, and Skills-based Learning</b><br/> <b>8 am – 4:30 pm (~8 hours)</b><br/> <b>Goal:</b> Patient/Family demonstrates competency in blood glucose/ketone monitoring and insulin administration prior to discharge.</p> <p><b>8:00 am:</b></p> <ul style="list-style-type: none"> <li>• Program Overview with Patient/Family</li> <li>• RN/NP assess patient, obtain blood glucose/ketones, and page Diabetes Service</li> <li>• NP sends diabetes prescriptions to CVS</li> </ul> <p><b>8:45 am: Breakfast and Skills</b></p> <p><b>9:45 am:</b></p> <ul style="list-style-type: none"> <li>• Diabetes MD(s) Evaluation Day 1</li> </ul> <p><b>10:15 am:</b></p> <ul style="list-style-type: none"> <li>• SW Assessment Day 1</li> </ul> <p><b>11:00 am:</b></p> <ul style="list-style-type: none"> <li>• RD Education Day 1</li> <li>• Meal Plan for remainder of DDTP (RD and RN)</li> </ul> <p><b>12:15 pm: Lunch and Skills</b></p> <ul style="list-style-type: none"> <li>• Family picks up supplies in CVS</li> </ul> <p><b>1:30 pm</b></p> <ul style="list-style-type: none"> <li>• DNE Education Day 1</li> <li>• Supply review and call-in instructions</li> </ul> <p><b>4:30 pm</b></p> <ul style="list-style-type: none"> <li>• Review plan for return time and expectations for Day 2</li> <li>• Family option to stay for dinner if want more skills practice</li> </ul> | <p><b>DAY 2: General Management Concepts, Nutrition, Exercise, Sick Day, Glucagon</b><br/> <b>8 am – 1 pm (~5 hours)</b><br/> <b>Goals:</b><br/> <b>A)</b> Patient/Family will be proficient in blood glucose/ketone monitoring and insulin administration.<br/> <b>B)</b> Patient/Family demonstrates understanding of fundamental diabetes management and nutrition concepts.</p> <p><b>8 am:</b></p> <ul style="list-style-type: none"> <li>• RN/NP assess patient, obtain blood glucose/ketones, and page Diabetes Service</li> <li>• <b>Breakfast and Skills</b></li> </ul> <p><b>9 am:</b></p> <ul style="list-style-type: none"> <li>• RD Education Day 2</li> </ul> <p><b>10 am:</b></p> <ul style="list-style-type: none"> <li>• DNE Education Day 2</li> </ul> <p><b>11:45 am:</b></p> <ul style="list-style-type: none"> <li>• Diabetes MD(s) Evaluation Day 2</li> </ul> <p><b>12 pm</b></p> <ul style="list-style-type: none"> <li>• <b>Lunch and Skills</b></li> <li>• Evaluate need to return for Day 3</li> </ul> <p><b>1 pm</b></p> <ul style="list-style-type: none"> <li>• SW Check-in Day 2</li> </ul> <p><b>1:30pm</b></p> <ul style="list-style-type: none"> <li>• Discharge to Home</li> </ul> |
|------------------------------------------------------------------------------------------------------------------------------------------------------------------------------------------------------------------------------------------------------------------------------------------------------------------------------------------------------------------------------------------------------------------------------------------------------------------------------------------------------------------------------------------------------------------------------------------------------------------------------------------------------------------------------------------------------------------------------------------------------------------------------------------------------------------------------------------------------------------------------------------------------------------------------------------------------------------------------------------------------------------------------------------------------------------------------------------------------------------------------------------------------------------------------------------------------------------------------------------------------------------------------------------------------------------------------------------------------------------------------------------------------------------------------|-----------------------------------------------------------------------------------------------------------------------------------------------------------------------------------------------------------------------------------------------------------------------------------------------------------------------------------------------------------------------------------------------------------------------------------------------------------------------------------------------------------------------------------------------------------------------------------------------------------------------------------------------------------------------------------------------------------------------------------------------------------------------------------------------------------------------------------------------------------------------------------------------------------------------------------------------------------------------------------------------------------------------------------------------------------------------------------------------------------------------------------------------------------------------------------------------------------------------|

**Abbreviations:** DDTP, Diabetes Day Treatment Program; DNE, diabetes nurse educator; MD, medical doctor; NP, nurse practitioner; RD, registered dietitian; RN, registered nurse; SW, social work.

**Figure Legend**

A typical example of the daily visit schedule for the Diabetes Day Treatment Program-Emergency Department Referral Pathway.
