# Supplementary material for: Using Quality Improvement to Design and Evaluate an Outpatient Day Treatment Pathway for Pediatric Patients with Diabetes Mellitus Requiring Insulin Initiation
Source: PubMed Central journal article supplement (PMC11578214; doi:10.1097/pq9.0000000000000776), 2024-11-20
Supplement: pqs-9-e776-s003.pdf [file pqs-9-e776-s003.pdf]

**Title:** Using Quality Improvement to Design and Evaluate an Outpatient Day Treatment Pathway for Education and Management of Pediatric Patients with Diabetes Mellitus Requiring Insulin Initiation

**First Authors:** Svetlana Azova, MD, Charumathi Baskaran, MD

**SDC, Table 2.** Timeline of Refinements to the Diabetes Day Treatment Program-Emergency Department Referral Pathway

| <b>PDSA Cycle</b> | <b>Date</b> | <b>Description</b>                                                                                                                                                                                                                                                 | <b>Outcome</b> |
|-------------------|-------------|--------------------------------------------------------------------------------------------------------------------------------------------------------------------------------------------------------------------------------------------------------------------|----------------|
| Launch            | 9/28/2020   | Initial pathway                                                                                                                                                                                                                                                    |                |
| PDSA 1            | 11/2/2020   | Extended referral time from 7:30 pm to 9 pm                                                                                                                                                                                                                        | Adopt          |
| PDSA 2            | 12/1/2020   | Increased BOHB cutoff from 1 to 1.5 mmol/L                                                                                                                                                                                                                         | Adopt          |
| PDSA 3            | 1/29/2021   | Expanded referral criteria to include BOHB < 1.5 mmol/L post fluid bolus with initial BOHB 1.5-2.5 mmol/L                                                                                                                                                          | Adapt          |
| PDSA 4            | 4/1/2021    | Added option to have patients who present overnight (9 pm-7:30 am), outside of standard referral time frame, to return within 24-36 hours. Expanded referral criteria to include absence of significant mental health or cognitive concerns in patient/caretakers. | Adopt          |
| PDSA 5            | 9/1/2021    | Changed referral criteria to include repeat BOHB < 1.5 mmol/L 2-3 hours post-rapid-acting insulin bolus for initial BOHB 1.5-2.5 mmol/L                                                                                                                            | Adopt          |

**Abbreviations:** BOHB, beta-hydroxybutyrate, PDSA, plan-do-study-act.
